# Supplementary material
Source: publisher site journal article supplement (https://www.dovepress.com/article/374175)
Supplement: Supplementary file 1 [file get_supplementary_file.php]

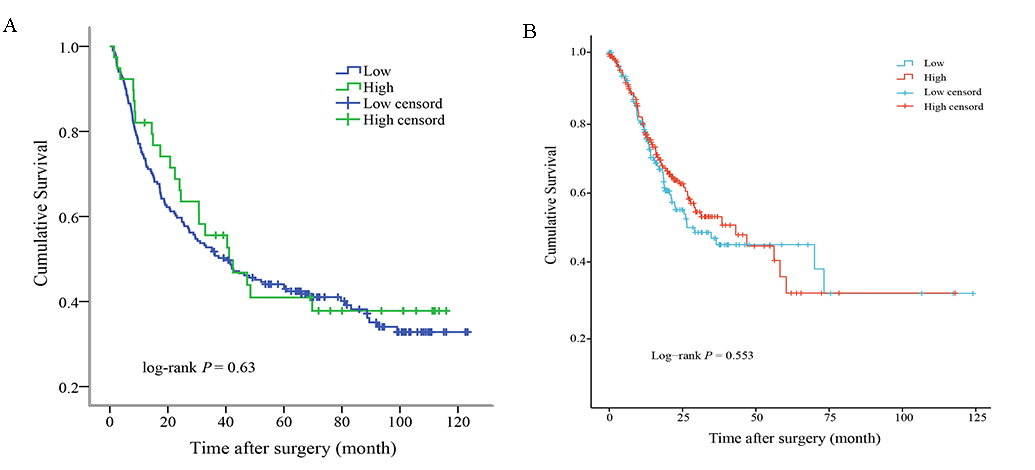
Figure S1. Role of PTEN expression in the survival of GC patients. (A) Protein expression in the cohort of this study. (B) mRNA expression in TCGA data.
